# Supplementary material
Source: PubMed Central journal article supplement (PMC165861)

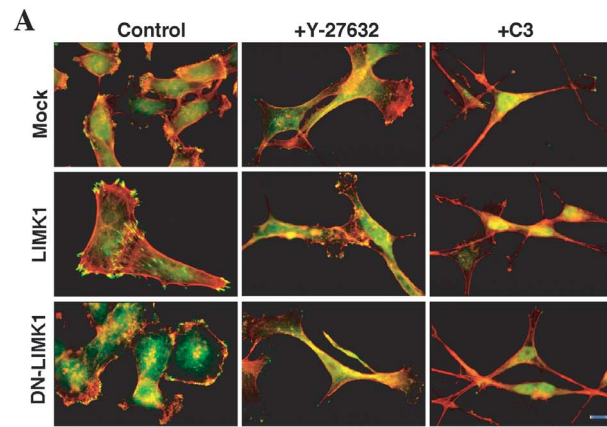

Supplement: pnas_1232344100_2.pdf [file pnas_1232344100_2.pdf]

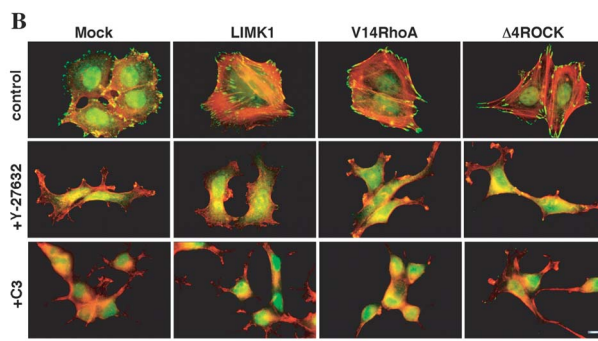

Supplement: pnas_1232344100_3.pdf [file pnas_1232344100_3.pdf]
